# Supplementary material for: Role of size, alio-/multi-valency and non-stoichiometry in the synthesis of phase-pure high entropy oxide (Co,Cu,Mg,Na,Ni,Zn)O
Source: Royal Society of Chemistry journal article supplement (doi:10.1039/d0dt00958j), 2020-01-01
Supplement: d0dt00958j1.pdf [file d0dt00958j1.pdf]

## Supplementary information

### **Role of size, alio-/multi-valency and non-stoichiometry in the synthesis of phase-pure high entropy oxide (Co,Cu,Mg,Na,Ni,Zn)O**

**Nandhini J. Usharani, Rajat Shringi, Harshil Sanghavi, S. Subramanian<sup>2</sup> and S.S. Bhattacharya<sup>#</sup>**

*Nano Functional Materials Technology centre, (NFMTC),*

*Department of Metallurgical and Materials engineering,*

<sup>2</sup>*Sophisticated Analytical Instrument Facility,*

*Indian Institute of Technology Madras, Chennai-600036, India.*

<sup>#</sup>ssb@iitm.ac.in

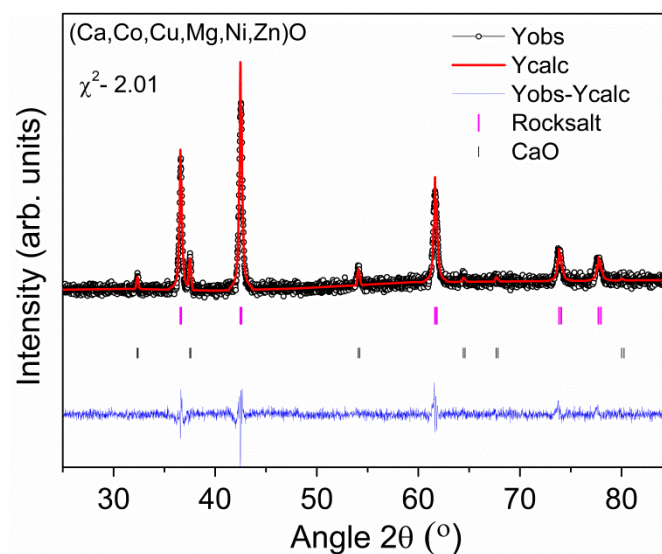

Figure S1 Rietveld refinement of XRD pattern of (Ca,Co,Cu,Mg,Ni,Zn)O showing the presence of rocksalt structure and CaO

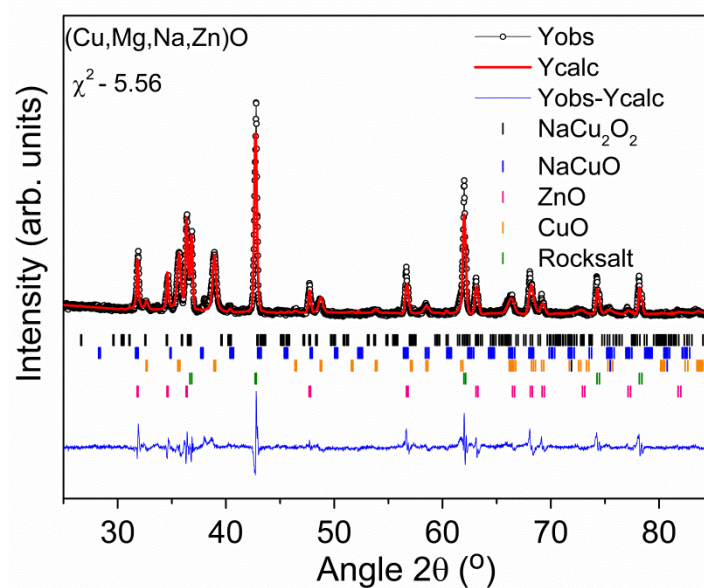

Figure S2 Rietveld refinement of the XRD pattern of (Cu,Mg,Na,Zn)O showing the presence of multiple phases (rocksalt – 52%, monoclinic – 26%, hexagonal – 20.17% with some minor amounts of orthorhombic  $\text{Na}_2\text{Cu}_2\text{O}_2$  and tetragonal NaCuO)

**Table S1 d-spacing obtained from Rietveld refinement of (Co,Cu,Mg,Ni,Na,Zn)O**

| 2-theta (°) | d-spacing (Å) | (hkl)  |
|-------------|---------------|--------|
| 36.629      | 2.45133       | (-201) |
| 36.703      | 2.446501      | (110)  |
| 36.718      | 2.445596      | (001)  |
| 42.529      | 2.123879      | (200)  |
| 42.665      | 2.117439      | (-111) |
| 61.758      | 1.500846      | (-311) |
| 61.879      | 1.498212      | (111)  |
| 61.882      | 1.498152      | (-202) |
| 61.964      | 1.49636       | (020)  |
| 73.9        | 1.28141       | (-401) |
| 74.002      | 1.279899      | (310)  |
| 74.066      | 1.278951      | (201)  |
| 74.1        | 1.278448      | (-312) |
| 74.184      | 1.277205      | (-221) |
| 74.21       | 1.276819      | (-112) |
| 74.239      | 1.276392      | (021)  |
| 77.873      | 1.225665      | (-402) |
| 78.056      | 1.223251      | (220)  |
| 78.09       | 1.222798      | (002)  |

**Table S2 Occupancy of cations from Rietveld refinement of (Co,Cu,Mg,Na,Ni,Zn)O**

| <b>Cation</b> | <b>X</b> | <b>Y</b> | <b>Z</b> | <b>occupancy</b> |
|---------------|----------|----------|----------|------------------|
| <b>O</b>      | 0        | 0.5      | 0.5      | 0.9326           |
| <b>Co</b>     | 0        | 0        | 0        | 0.1666           |
| <b>Cu</b>     | 0        | 0        | 0        | 0.1666           |
| <b>Mg</b>     | 0        | 0        | 0        | 0.1666           |
| <b>Na</b>     | 0        | 0        | 0        | 0.1666           |
| <b>Ni</b>     | 0        | 0        | 0        | 0.1666           |
| <b>Zn</b>     | 0        | 0        | 0        | 0.1666           |

**Table S3 Composition from energy dispersive spectroscopy**

| <b>Composition</b> | <b>Co</b> | <b>Cu</b> | <b>Na</b> | <b>Ni</b> | <b>Mg</b> | <b>Zn</b> |
|--------------------|-----------|-----------|-----------|-----------|-----------|-----------|
|                    | (%)       | (%)       | (%)       | (%)       | (%)       | (%)       |
| <b>Na-TMO</b>      | 8.3       | 6.5       | 9.6       | 8.0       | 10.0      | 7.6       |
| <b>ME-TMO</b>      | 11.3      | 9.7       | -         | 10.3      | 8.4       | 10.3      |

**Table S4 Assignment of the peaks obtained in X-ray photoelectron spectroscopy**

| Cation | Oxidation state             | Assigned to                 | Position (eV) |
|--------|-----------------------------|-----------------------------|---------------|
| Ni     | +3                          | 2p <sub>3/2</sub>           | 856.39        |
|        |                             | 2p <sub>3/2</sub> satellite | 862.45        |
|        |                             | 2p <sub>1/2</sub>           | 873.52        |
|        | +2                          | 2p <sub>3/2</sub>           | 855.03        |
|        |                             | 2p <sub>3/2</sub> satellite | 860.31        |
|        |                             | 2p <sub>1/2</sub>           | 871.86        |
|        | 0                           | 2p <sub>1/2</sub> satellite | 877.65        |
|        | 2p                          | 852.86                      |               |
| Co     | +3                          | 2p <sub>3/2</sub>           | 779.73        |
|        |                             | 2p <sub>3/2</sub> satellite | 788.82        |
|        |                             | 2p <sub>1/2</sub>           | 796.26        |
|        |                             | 2p <sub>1/2</sub> satellite | 803.27        |
|        | +2                          | 2p <sub>3/2</sub>           | 781.72        |
|        |                             | 2p <sub>3/2</sub> satellite | 786.04        |
|        |                             | 2p <sub>1/2</sub>           | 794.14        |
|        | 2p <sub>1/2</sub> satellite | 800.48                      |               |
| Cu     | +2                          | 2p <sub>3/2</sub>           | 933.03        |
|        |                             | 2p <sub>3/2</sub> satellite | 938.68        |
|        |                             | 2p <sub>1/2</sub>           | 954.23        |
|        |                             | 2p <sub>1/2</sub> satellite | 960.65        |
|        | +1                          | 2p <sub>3/2</sub>           | 932.46        |
|        | 2p <sub>1/2</sub>           | 952.03                      |               |
| Na     | +1                          | 1s                          | 1070.89       |
| Zn     | +2                          | 2p <sub>3/2</sub>           | 1020.36       |
|        |                             | 2p <sub>3/2</sub> satellite | 1035.04       |
|        |                             | 2p <sub>1/2</sub>           | 1043.37       |
| Mg     | +2                          | 2p                          | 49.54         |
| O      | O <sup>2-</sup>             |                             | 530.05        |
|        | O <sup>1-</sup>             | 1s                          | 531.80        |
|        | Adsorbed                    |                             | 533.70        |

**Table S5 Binding energies of Cu used for assignment of oxidation states**

| Compound             | Oxidation state  | 2p <sub>3/2</sub> (eV) | 2p <sub>1/2</sub> (eV) | 2p <sub>3/2</sub> S (eV) | 2p <sub>1/2</sub> S (eV) | Ref          |
|----------------------|------------------|------------------------|------------------------|--------------------------|--------------------------|--------------|
| Ni doped CuO         | Cu <sup>2+</sup> | 933.15                 | 953.5                  | 941.8                    | 961.5                    | 1            |
| Cu <sub>2</sub> O    | Cu <sup>1+</sup> | 932.0                  | 951.8                  | NA <sup>a</sup>          | NA <sup>a</sup>          | 2            |
| CuO                  | Cu <sup>2+</sup> | 933.8                  | -                      | -                        | -                        | 3            |
|                      | Cu <sup>1+</sup> | 932.8                  | -                      | -                        | -                        |              |
| CuO                  | Cu <sup>2+</sup> | 933.3                  | 953.2                  | 942                      | 962                      | 4            |
| CuO                  | Cu <sup>2+</sup> | 933.8                  | -                      | -                        | -                        | 5            |
|                      | Cu <sup>1+</sup> | 932.6                  | -                      | -                        | -                        |              |
| CuO                  | Cu <sup>2+</sup> | 933.6                  | -                      | -                        | -                        | 6            |
|                      | Cu <sup>1+</sup> | 932.4                  | -                      | -                        | -                        |              |
| CuO                  | Cu <sup>2+</sup> | 933.9                  | 953.9                  | -                        | -                        | 7            |
|                      | Cu <sup>1+</sup> | 932.3                  | 952.2                  | -                        | -                        |              |
| (Co,Cu,Mg,Na,Ni,Zn)O | Cu <sup>2+</sup> | 933.03                 | 954.23                 | 938.68                   | 960.65                   | Present work |
|                      | Cu <sup>1+</sup> | 932.46                 | 952.03                 | -                        | -                        |              |

<sup>a</sup> Values mentioned as \*NA is respective peak does not exist for the particular oxidation state.

**Table S6 Binding energies of Zn used for assignment of oxidation states**

| Compound             | Oxidation state  | 2p <sub>3/2</sub> (eV) | 2p <sub>1/2</sub> (eV) | Ref          |
|----------------------|------------------|------------------------|------------------------|--------------|
| ZnO                  | Zn <sup>2+</sup> | 1021.8                 | 1044.9                 | 8            |
| ZnO                  | Zn <sup>2+</sup> | 1022.40                | -                      | 9            |
| ZnO                  | Zn <sup>2+</sup> | 1021.5                 | -                      | 10           |
| ZnO                  | Zn <sup>2+</sup> | 1022                   | 1045                   | 11           |
| (Co,Cu,Mg,Na,Ni,Zn)O | Zn <sup>2+</sup> | 1020.36                | 1043.37                | Present work |

**Table S7 Binding energies of O used for assignment of position of O in the lattice**

| Compound                            | O lattice (eV) | O deficiency (eV) | O adsorbed (eV) | Ref          |
|-------------------------------------|----------------|-------------------|-----------------|--------------|
| ZnO                                 | 530.2          | 531.8             | 533.4           | 12           |
| Al doped ZnO                        | 530.15         | 531.25            | 532.40          | 9            |
| ZnO                                 | 530.2          | 531.4             | 532.6           | 13           |
| MgO                                 | 530.3-530.6    | 532.5-533.5       | -               | 14           |
| Co <sub>1-x</sub> Na <sub>x</sub> O | 529.9          | -                 | 531.4 eV.       | 15           |
| CoO                                 | 529.5          | 530.8             | 533.0           | 16           |
| (Co,Cu,Mg,Na,Ni,Zn)O                | 530.05         | 531.80            | 533.7           | Present work |

**Table S8 Binding energies of Mg used for assignment of oxidation states**

| Compound             | Oxidation state  | 2p (eV) | Ref          |
|----------------------|------------------|---------|--------------|
| MgO                  | Mg <sup>2+</sup> | 50.8    | 14           |
| MgO                  | Mg <sup>2+</sup> | 49.3    | 17           |
| MgO                  | Mg <sup>2+</sup> | 49.8    | 18           |
| (Co,Cu,Mg,Na,Ni,Zn)O | Mg <sup>2+</sup> | 49.54   | Present work |

**Table S9 Binding energies of Na used for assignment of oxidation states**

| Compounds                           | Oxidation state  | 2s (eV) | Ref          |
|-------------------------------------|------------------|---------|--------------|
| Na <sub>x</sub> CoO <sub>2</sub>    | Na <sup>1+</sup> | 1071.71 | 19           |
| Na doped ZnO                        | Na <sup>1+</sup> | 1073.2  | 20           |
| Co <sub>1-x</sub> Na <sub>x</sub> O | Na <sup>1+</sup> | 1072    | 15           |
| Na doped NiO                        | Na <sup>1+</sup> | 1072.8  | 21           |
| (Co,Cu,Mg,Na,Ni,Zn)O                | Na <sup>1+</sup> | 1070.89 | Present work |

**Table S10 Binding energies of Ni used for assignment of oxidation states**

| Compounds                                         | Oxidation state  | 2p <sub>3/2</sub> (eV) | 2p <sub>1/2</sub> (eV) | 2P <sub>3/2</sub> S (eV) | 2P <sub>1/2</sub> S (eV) | Ref          |
|---------------------------------------------------|------------------|------------------------|------------------------|--------------------------|--------------------------|--------------|
| NiO                                               | Ni <sup>2+</sup> | 854.1                  | 871.6                  | 861.2                    | 878.8/881.5              | 22           |
| Co-doped NiO                                      | Ni <sup>2+</sup> | 854.3                  | 874.0                  |                          |                          | 23           |
| Na <sub>2</sub> Ni <sub>2</sub> TeO <sub>6</sub>  | Ni <sup>2+</sup> | 854.2                  | -                      | -                        | -                        | 24           |
|                                                   | Ni <sup>3+</sup> | 855.4                  | -                      | -                        | -                        |              |
| Ni <sub>2</sub> O <sub>3</sub> .6H <sub>2</sub> O | Ni <sup>3+</sup> | 855.1                  | 872.7                  | 860.9                    | 879.3                    | 25           |
| Na doped NiO                                      | Ni <sup>2+</sup> | 854.5                  | 872.7                  | 861.7                    | 880.8                    | 21           |
|                                                   | Ni <sup>3+</sup> | 856.3                  | -                      | -                        | -                        |              |
| NiO                                               | Ni <sup>2+</sup> | 853.5                  | 872.8                  | 861.3                    | 879.1                    | 26           |
|                                                   | Ni <sup>3+</sup> | 855.5                  | -                      | -                        | -                        |              |
| (Co,Cu,Mg,Na,Ni,Zn)O                              | Ni <sup>2+</sup> | 855.03                 | 871.86                 | 860.31                   | 877.65                   | Present work |
|                                                   | Ni <sup>3+</sup> | 856.39                 | 873.52                 | 862.45                   | -                        |              |

**Table S11 Binding energies of Co used for assignment of oxidation states**

| Compounds                      | Oxidation state  | 2p <sub>3/2</sub> (eV) | 2p <sub>1/2</sub> (eV) | 2p <sub>3/2</sub> S (eV) | 2p <sub>1/2</sub> S (eV) | Ref          |
|--------------------------------|------------------|------------------------|------------------------|--------------------------|--------------------------|--------------|
| Co-doped NiO                   | Co <sup>2+</sup> | 780                    | 795.5                  | -                        | -                        | 23           |
| CoO                            | Co <sup>2+</sup> | 780.5                  | 796.3                  | 786.4                    | 803.0                    | 16           |
| Co <sub>3</sub> O <sub>4</sub> | Co <sup>3+</sup> | 779.6                  | 794.5                  | 789.5                    | 804.5                    | 16           |
| CoO                            | Co <sup>2+</sup> | 780.6                  | 796.8                  | -                        | -                        | 27           |
| Co <sub>3</sub> O <sub>4</sub> | Co <sup>3+</sup> | 779.6                  | -                      | 787.9                    | 803.8                    | 28           |
| (Co,Cu,Mg,Na,Ni,Zn)O           | Co <sup>2+</sup> | 781.72                 | 794.14                 | 786.04                   | 800.48                   | Present work |
|                                | Co <sup>3+</sup> | 779.73                 | 796.26                 | 788.82                   | 803.27                   |              |

**Table S12 Ionic radii difference of each cation as compared to Ni<sup>2+</sup>**

| Element | Oxidation state | Ionic radii (pm) | Co-ordination number | Ionic radii difference compared to Ni <sup>2+</sup> |
|---------|-----------------|------------------|----------------------|-----------------------------------------------------|
| Co      | +2              | 745              | +6                   | 7.9 %                                               |
| Cu      | +2              | 73               | +6                   | 5.7 %                                               |
| Mg      | +2              | 72               | +6                   | 4.3 %                                               |
| Na      | +1              | 102              | +6                   | 47.8 %                                              |
| Ni      | +2              | 69               | +6                   | -                                                   |
| Zn      | +2              | 74               | +6                   | 7.2 %                                               |

### References

- 1 S. Dolai, S. N. Sarangi, S. Hussain, R. Bhar and A. K. Pal, *J. Magn. Magn. Mater.*, 2019, **479**, 59–66.
- 2 L. Li, L. Xu, W. Shi and J. Guan, *Int. J. Hydrogen Energy*, 2013, **38**, 816–822.
- 3 C. C. Chusuei, M. A. Brookshier and D. W. Goodman, *Langmuir*, 1999, **15**, 2806–2808.
- 4 A. I. Stadnichenko, A. M. Sorokin and A. I. Boronin, *J. Struct. Chem.*, 2008, **49**, 341–347.
- 5 G. Panzner, B. Egert and H. P. Schmidt, *Surf. Sci.*, 1985, **151**, 400–408.
- 6 S. Poulston, P. M. Parlett, P. Stone and M. Bowker, *Surf. Interface Anal.*, 1996, **24**, 811–820.
- 7 D. Barreca, A. Gasparotto and E. Tondello, *Surf. Sci. Spectra*, 2007, **14**, 41–51.
- 8 Z. Zhang, C. Shao, X. Li, C. Wang, M. Zhang and Y. Liu, *ACS Appl. Mater. Interfaces*, 2010, **2**, 2915–2923.
- 9 M. Chen, X. Wang, Y. H. Yu, Z. L. Pei, X. D. Bai, C. Sun, R. F. Huang and L. S. Wen, *Appl. Surf. Sci.*, 2000, **158**, 134–140.
- 10 L. Armelao, D. Barreca, G. Bottaro, A. Gasparotto, D. Leonarduzzi, C. Maragno and E. Tondello, *Surf. Sci. Spectra*, 2006, **13**, 9–16.
- 11 X. Q. Wei, B. Y. Man, M. Liu, C. S. Xue, H. Z. Zhuang and C. Yang, *Phys. B Condens. Matter*, 2007, **388**, 145–152.
- 12 J. Wang, Z. Wang, B. Huang, Y. Ma, Y. Liu, X. Qin, X. Zhang and Y. Dai, *ACS Appl. Mater. Interfaces*, 2012, **4**, 4024–4030.
- 13 P. T. Hsieh, Y. C. Chen, K. S. Kao and C. M. Wang, *Appl. Phys. A Mater. Sci. Process.*, 2008, **90**, 317–321.
- 14 J. S. Corneille, J. W. He and D. W. Goodman, *Surf. Sci.*, 1994, **306**, 269–278.
- 15 C. Chen, F. Delorme, F. Schoenstein, M. Zaghrioui, D. Flahaut, J. Allouche and F. Giovannelli, *J. Eur. Ceram. Soc.*, 2019, **39**, 346–351.
- 16 T. J. Chuang, C. R. Brundle and D. W. Rice, *Surf. Sci.*, 1976, **59**, 413–429.

- 17 F. Khairallah and A. Glisenti, *Surf. Sci. Spectra*, 2006, **13**, 58–71.
- 18 C. Ruby, B. Humbert and J. Fusy, *Surf. Interface Anal.*, 2000, **29**, 377–380.
- 19 H. Sang, G. Ho, D. Hyun and S. Ihl, *Curr. Appl. Phys.*, 2015, **15**, 412–416.
- 20 Z. Wu, Y. Li, L. Gao, S. Wang and G. Fu, *Dalt. Trans.*, 2016, **45**, 11145.
- 21 Y. Rama, K. Lee, C. Park, S. Kun, H. Jae, D. Yang and S. Seo, *Thin Solid Films*, 2015, **591**, 255–260.
- 22 A. N. Mansour, *Surf. Sci. Spectra*, 1994, **3**, 231–238.
- 23 Z. Zheng, L. Huang, Y. Zhou, X. Hu and X. Ni, *Solid State Sci.*, 2009, **11**, 1439–1443.
- 24 A. Gupta, C. Buddie Mullins and J. B. Goodenough, *J. Power Sources*, 2013, **243**, 817–821.
- 25 A. N. Mansour and C. A. Melendres, *Surf. Sci. Spectra*, 1994, **3**, 263–270.
- 26 X. Geng, D. Lahem, C. Zhang, C. Li, M. Olivier and M. Debliquy, *Ceram. Int.*, 2019, **45**, 4253–4261.
- 27 M. Hassel and H.-J. Freund, *Surf. Sci. Spectra*, 1996, **4**, 273–278.
- 28 G. A. Carson, M. H. Nassir and M. A. Langell, *J. Vac. Sci. Technol. A Vacuum, Surfaces, Film.*, 1996, **14**, 1637–1642.
